# Supplementary material for: Comprehensive Molecular Landscape of Cetuximab Resistance in Head and Neck Cancer Cell Lines
Source: MDPI journal article supplement (doi:10.3390/cells11010154), 2022-01-04
Supplement: s1 [file s1]

**Table S1- IC<sub>50</sub> values for each cetuximab resistant clone established.**

| <b>Cell line</b>               | <b>Fadu Parental</b> | <b>C1</b>   | <b>C2</b> | <b>C5</b>  | <b>C6</b>  | <b>C7</b>  | <b>C9</b> | <b>C10</b> |
|--------------------------------|----------------------|-------------|-----------|------------|------------|------------|-----------|------------|
| <b>IC<sub>50</sub> (µg/mL)</b> | 216,9 ± 0,1          | 400,4 ± 0,5 | 1182± 0.4 | 3722 ± 0,8 | 572,1± 0,5 | 3001 ± 1,2 | 5320± 3,1 | ND         |
| <b>Fold Change</b>             | ND                   | 1,84        | 5,44      | 17,1       | 2,63       | 13,8       | 24,5      | ND         |

ND- Not determined

**Table S2-Main changes found in karyotype analysis between Fadu Parental and Fadu Resistant.**

| Cell Line | Karyotype                                                                                                                                                                                         |
|-----------|---------------------------------------------------------------------------------------------------------------------------------------------------------------------------------------------------|
| Parental  | 51~53,XY,+X,+1,add(1)(q44),+2,add(2)(q37),+3,add(4)(q35),-5,+6,+7,+8,+9,+10,+11,add(11)(p15),+12,-13,add(13)(q34),add(15)(q26),+16,+17,+18,+18,-19,add(19)(q13.4)-20,-21,-22,+3~6mar,1~2min[cp20] |
| Resistant | 52~56,XY,+X,+X,+1,add(1)(p36.3),+2,add(2)(q37)x2,+3,-4,-5,+6,+7,+7,+8,+9,+9,+10,+10,+11,+12,+12,-13,-14,add(14)(q34)+16,+17,+18,-19,-20,-21,-22,+6~9mar,1~2min[cp20]                              |

+ (additional chromosome), - (loss of chromosome); p (short arm of chromosome); q (long arm of chromosome ); mar (marker chromosome);; add (additional material of unknown origin); cp (composite karyotype)

**Table S3- Antibody conditions utilized in western blot analysis.**

| <b>Antibody</b>               | <b>Dilution</b> | <b>Condition</b> | <b>Manufacturer / Code</b> |
|-------------------------------|-----------------|------------------|----------------------------|
| Anti - $\beta$ actin          | 1/1000          | 4°C- Overnight   | Cell signaling/ #4967      |
| Anti- EGFR                    | 1/1000          | 4°C- Overnight   | Cell signaling/ #4267      |
| Anti- phospho-EGFR            | 1/1000          | 4°C- Overnight   | Cell signaling/ #2234      |
| Anti- phospho- AKT            | 1/1000          | 4°C- Overnight   | Cell signaling/ #9271      |
| Anti- AKT (total)             | 1/1000          | 4°C- Overnight   | Cell signaling/ #9272      |
| Anti- phospho- p44/42 MAPK    | 1/1000          | 4°C- Overnight   | Cell signaling/ #9101      |
| Anti- p44/42 MAPK (total)     | 1/1000          | 4°C- Overnight   | Cell signaling/ #9102      |
| Anti-mTOR                     | 1/1000          | 4°C- Overnight   | Cell signaling/ #2983      |
| Anti-Laminin B1               | 1/1000          | 4°C- Overnight   | Cell signaling/ #13435     |
| Anti-FADD                     | 1/1000          | 4°C- Overnight   | Cell signaling/ #2782      |
| Anti-CD44                     | 1/1000          | 4°C- Overnight   | Cell signaling/ #37259     |
| Anti-phospho-mTOR             | 1/1000          | 4°C- Overnight   | Cell signaling/ # #2974    |
| Anti-E-cadherin               | 1/1000          | 4°C- Overnight   | Cell signaling/ #3195      |
| Anti-N-cadherin               | 1/1000          | 4°C- Overnight   | Cell signaling/ #13116     |
| Anti- $\alpha$ -Smooth Muscle | 1/1000          | 4°C- Overnight   | Cell signaling/ #19245     |
| Anti-SLUG                     | 1/1000          | 4°C- Overnight   | Cell signaling/# 9585      |
| Anti-SNAIL                    | 1/1000          | 4°C- Overnight   | Cell signaling/ #3879      |
| Anti- TGF- $\beta$            | 1/1000          | 4°C- Overnight   | Cell signaling/#3711       |
| Anti-mouse IgG HPR            | 1/5000          | TA- 1 hour       | Cell signaling/ #7076      |
| Anti-rabbit IgG HPR           | 1/5000          | TA- 1 hour       | Cell signaling/ #7074      |

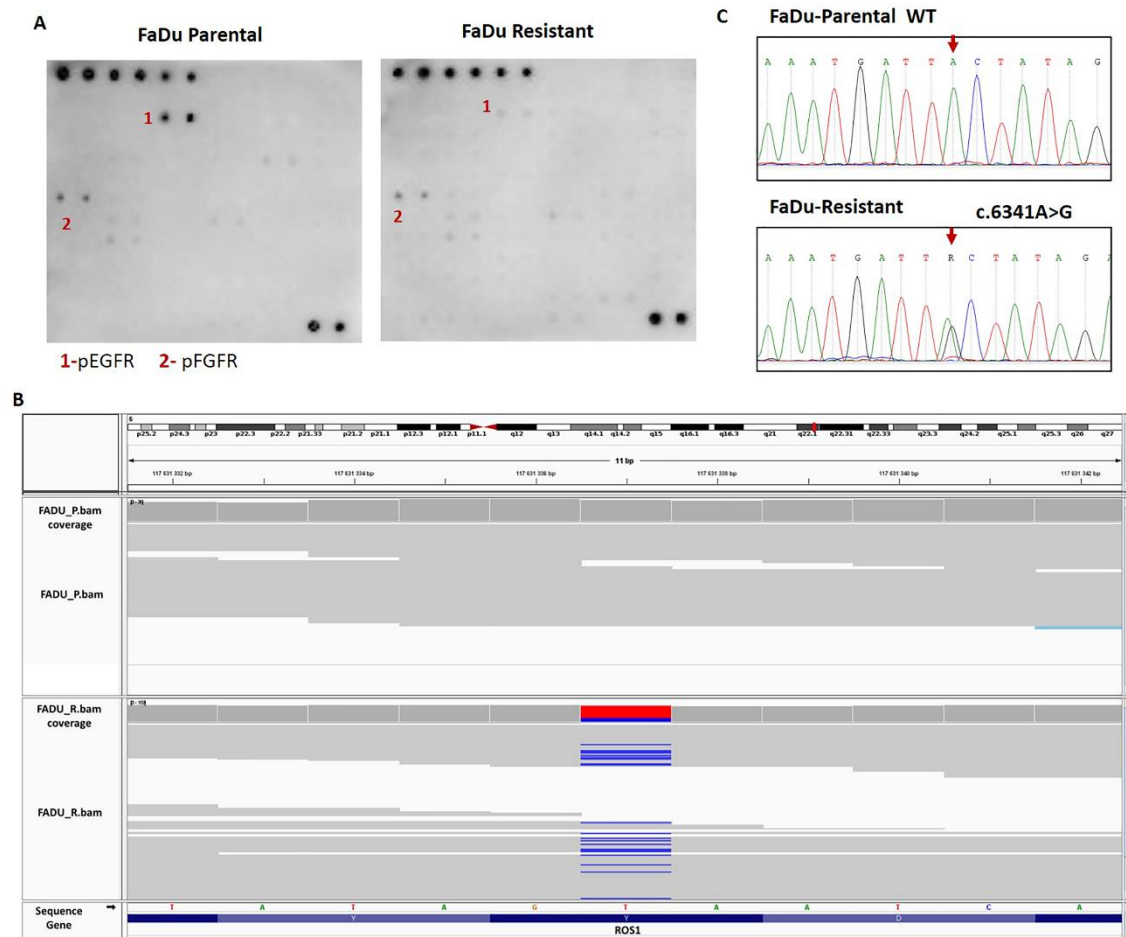

**Figure S1-** Cetuximab resistant model RTK'S phosphoarray and ROS1 c.6341A>G validation. A) RTK's phosphoarray of FaDu parental and FaDu resistant. B) Integrated Genomics Viewer (IGV) frequency of ROS 1 C.6341A>G mutation in FaDu parental (top) and FaDu resistant (bottom) cells. C) Sanger sequencing of ROS 1 C.6341A>G mutation in parental and resistant cells. The electropherogram depicts a ROS1 mutation C.6341A>G in the resistant cell line. FaDu Parental; R: FaDu Resistant.
